# Supplementary material for: TYRO3 agonist as therapy for glomerular disease
Source: PubMed Central journal article supplement (PMC9870075; doi:10.1172/jci.insight.165207), 2023-01-10

Figure S1

**A Glomerular scRNAseq:**

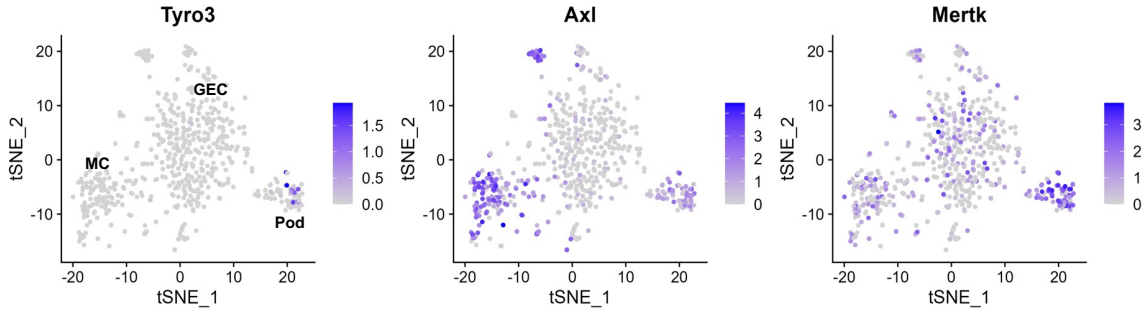

**B Kidney scRNAseq:**

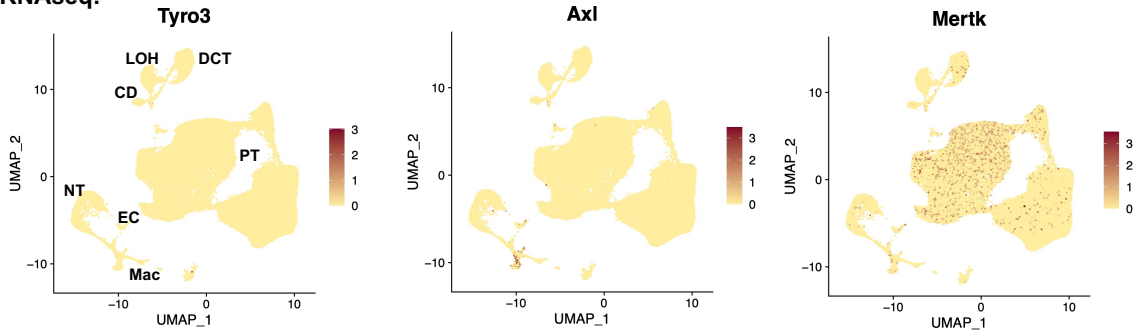

**C Immune cell scRNAseq:**

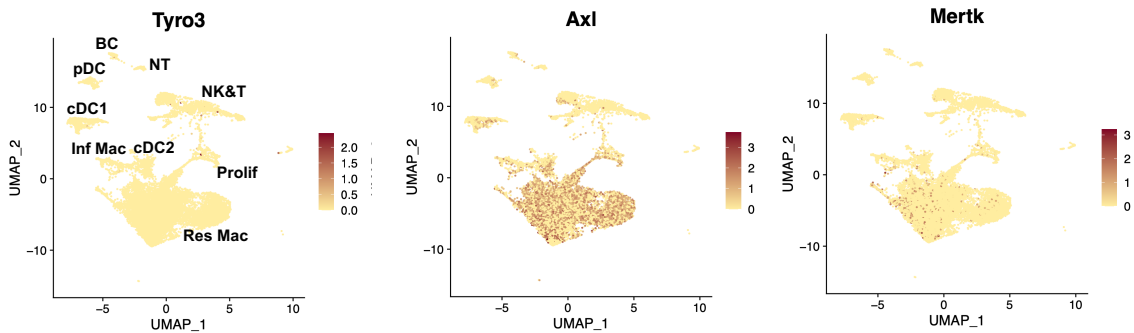

**D**

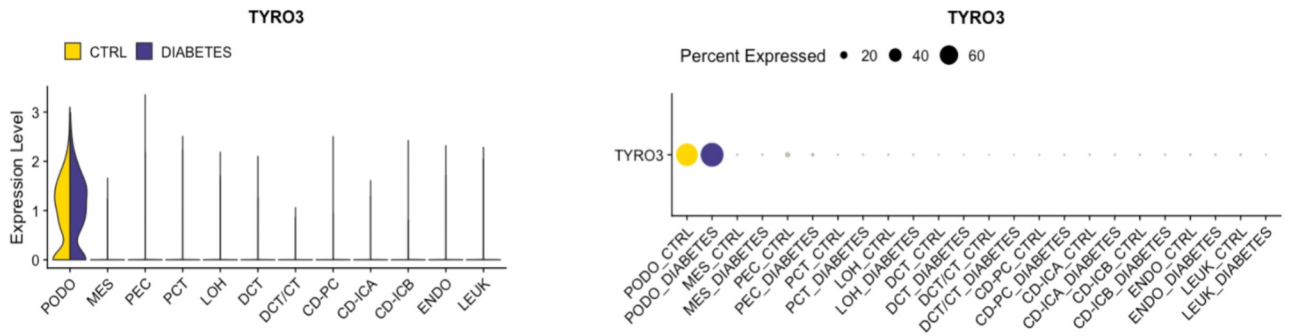

**Figure S1: *TYRO3* expression is limited to podocytes in mouse and human kidneys.** (A-C) Unsupervised clustering analysis of mouse glomerular scRNAseq (Fu J. et al., 2019) (A), kidney scRNAseq (without glomerular cells, Wu J. et al, 2022) (B), and CD45+ kidney immune cell scRNAseq (Fu J. et al., 2022) (C) collectively show podocyte-limited *Tyro3* expression, but more broad expressions of *Axl* and *Mer* receptors in the mouse kidney. (D) *TYRO3* expression is also limited to podocytes in human kidney single-nuclear RNAseq dataset (Wilson et al., 2019; <http://humphreyslab.com/SingleCell/>). GEC, glomerular endothelial cell; Pod, podocyte; MC, mesangial cells. LOH, loop of Henle; DCT, distal convoluted tubule; CD, collecting duct; PT, proximal tubule; NT, neutrophil; EC, endothelial; Mac, macrophage; cDC, conventional dendritic cell; pDC, plasmacytoid DC; NK&T, natural killer and T cells; Prolif, proliferating cell; Res Mac, resident macrophage; Inf Mac, infiltrating macrophage.

Figure S2

A

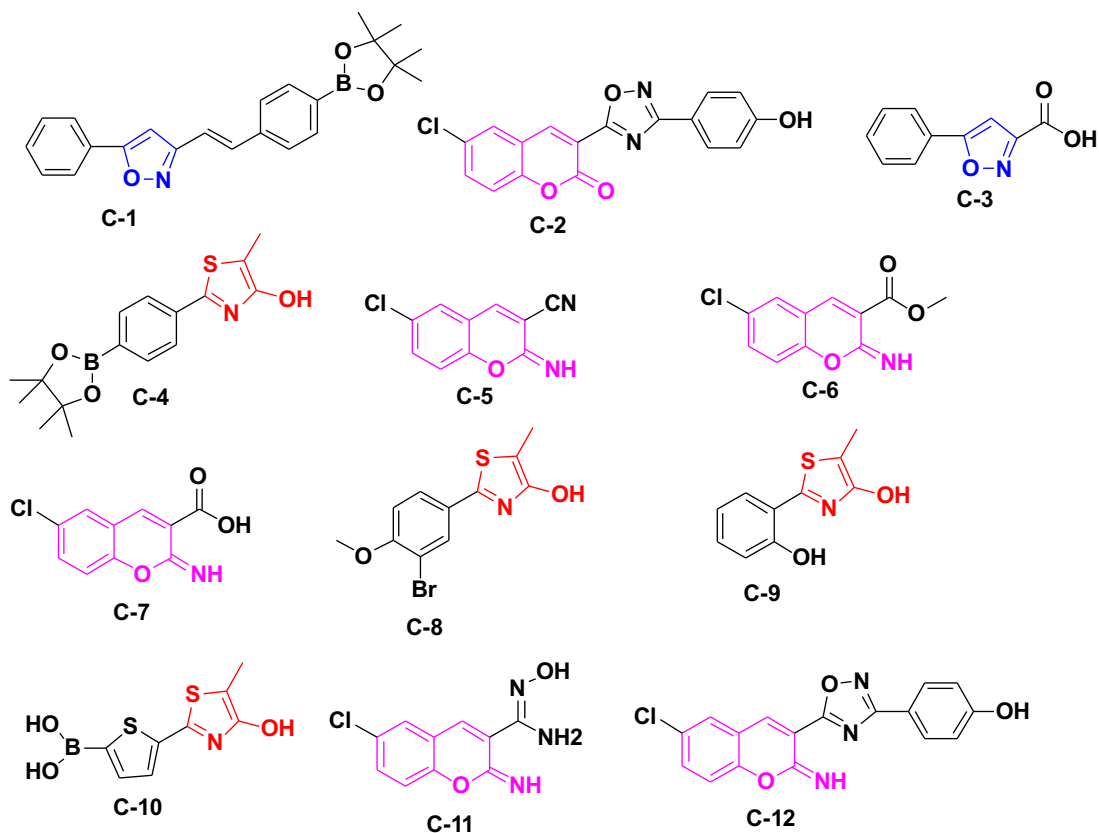

B

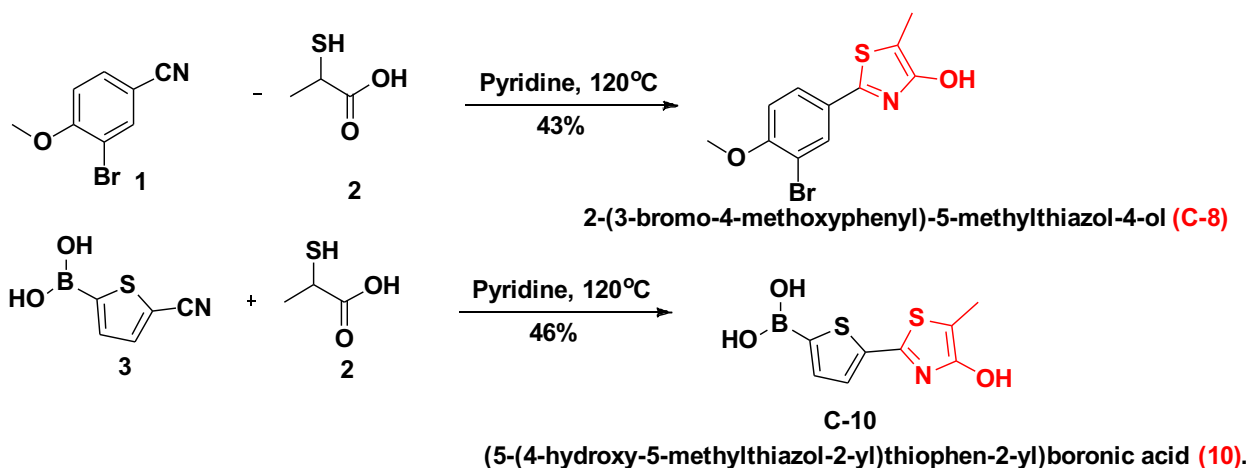

**Figure S2: Structures of putative TYRO3 agonists.** (A) 12 putative small molecule compounds designed as TYRO3 agonists. Compounds C-1 and C-3 contain isoxazole moiety (blue); C-2 contains 2H-chromen-2-one; C-5, C-6, C-7, C-11, and C-12 contain 2H-chromen-2-imine moiety (pink); and C-4, C-8, C-9, and C-10 contains 2-5 di-substituted thiazole-4-ol moiety (red). C-2 and C-12 also contain dioxazole moiety to improve solubility, and compound C-11 contains amidoxime moiety. (B) Examples of chemical reactions carried out for synthesis of TYRO3 agonist compounds C-8 and C-10.

Figure S3

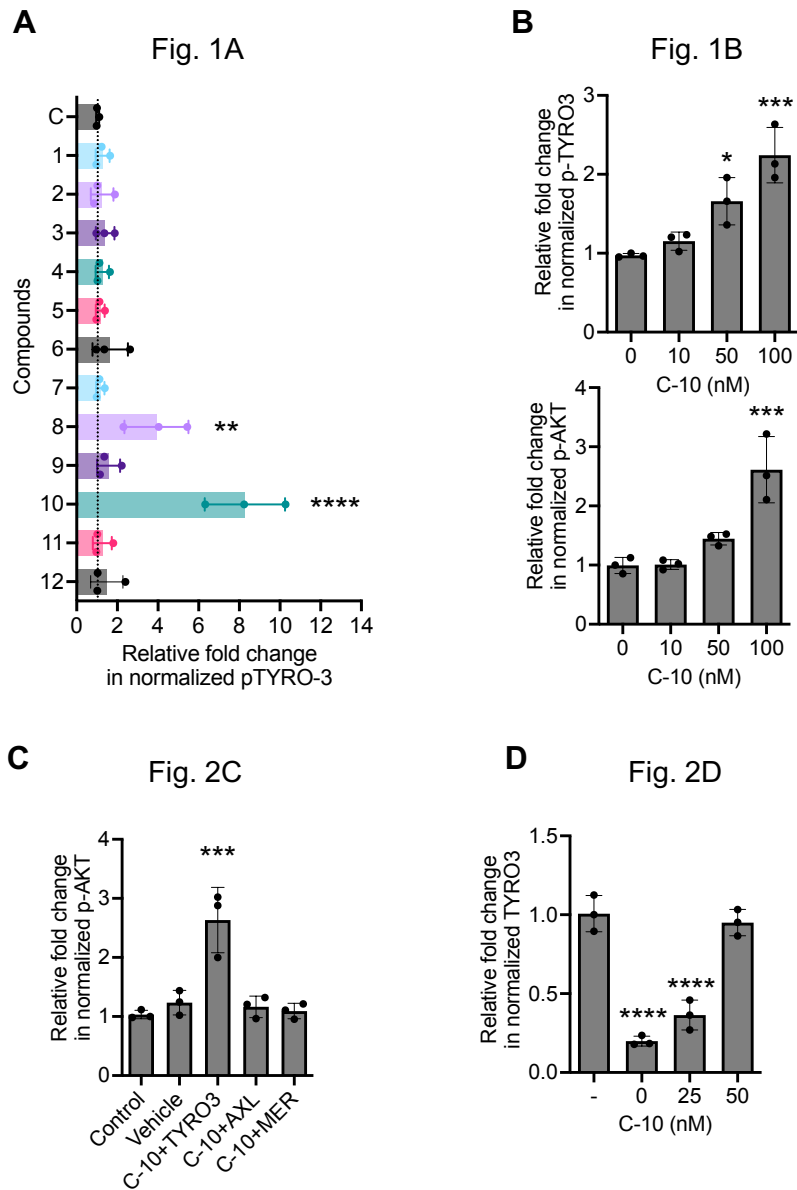

**Figure S#:** Densitometric analysis of western blots in Figures 1 and 2. (A-B) Densitometric analysis of western blots as shown in Figure 1A and 1B. (C-D) Densitometric analysis of western blots as shown in Figure 2C and 2D. n=3, \*P<0.05, \*\*\*P<0.001, and \*\*\*\*P<0.0001 vs. control group by 1-way ANOVA with Bonferroni correction.

**Figure S4**

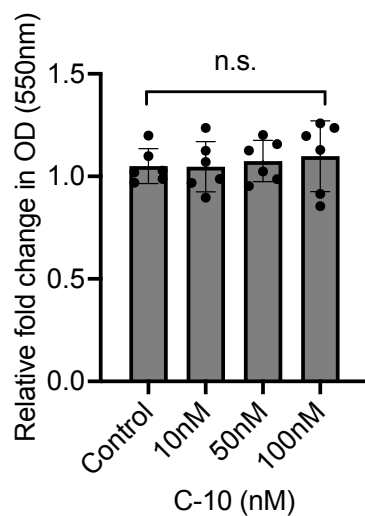

**Figure S4: C-10 does not affect podocyte viability.** Cell viability was evaluated using a 3-(4, 5-dimethyl thiazol-2-yl)-2,5-diphenyl tetrazolium bromide (MTT) assay kit in differentiated human podocytes ( $1 \times 10^4$  podocytes/well in 96 well plates). No significant differences in cell viability was found among the groups. N=3, n.s., not significant

**Figure S5**

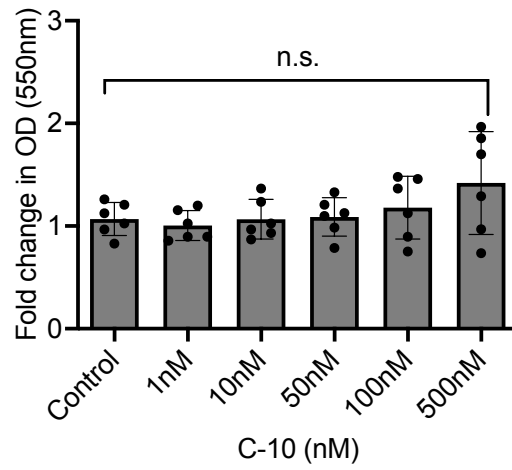

**Figure S5: Effects of C10 on gastric cancer cell proliferation:** Gastric cancer cell line, AGS (CRL-1739, ATCC) was seeded at  $2 \times 10^3$  cells/well and incubated with varying doses of C-10. Cell proliferation was assessed after 96 hours with MTT assay. No significant differences were found among the groups. N=3, n.s., not significant.

**Figure S6**

**A**

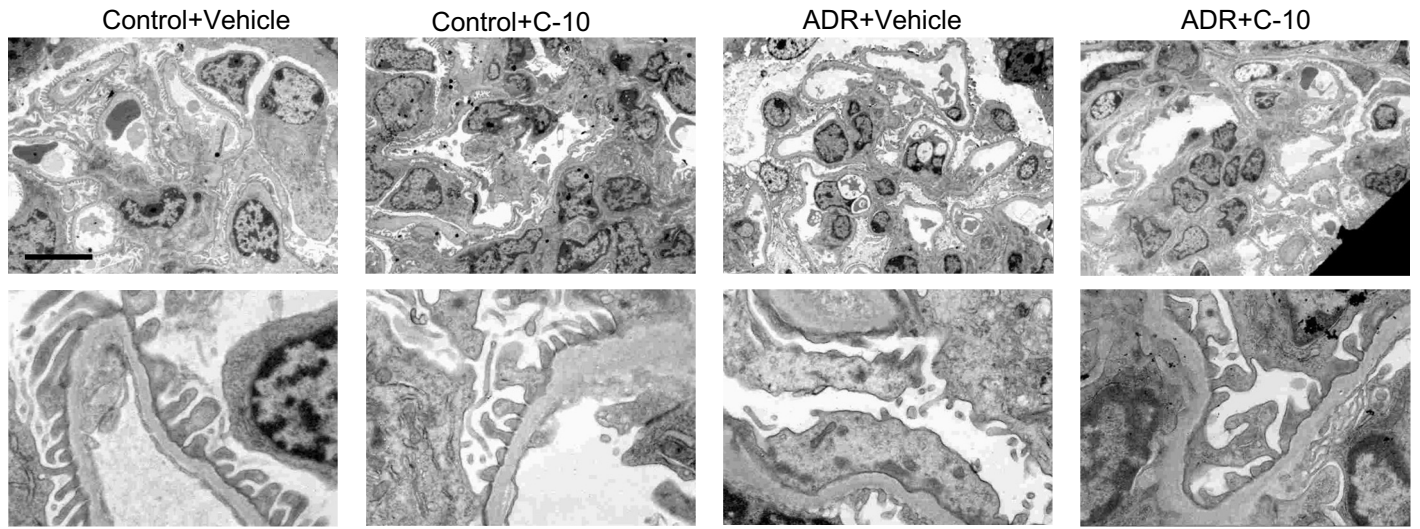

**B**

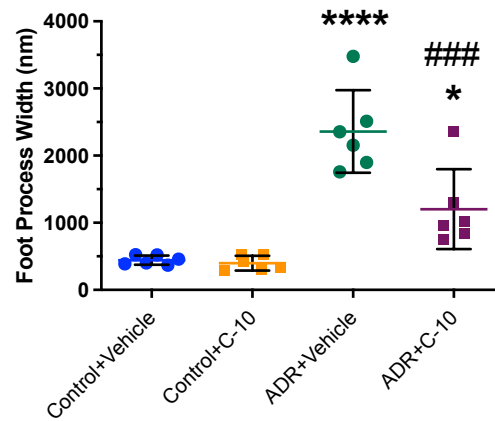

**Figure S6: C-10 ameliorates podocyte foot process effacement in mice with ADRN.** (A) Representative transmission electron microscopy images of control and ADRN mice at low (2k, top) and high (10k, bottom) magnifications. Scale bar: 5 $\mu$ m. (B) Quantification of foot process widths (60 glomeruli per group, n=6 mice per group). \*\*\*\* $P$ <0.0001 when compared with control group; ### $P$ <0.001 when compared with ADR+Vehicle mice by 1-way ANOVA with Bonferroni correction.

Figure S7

A

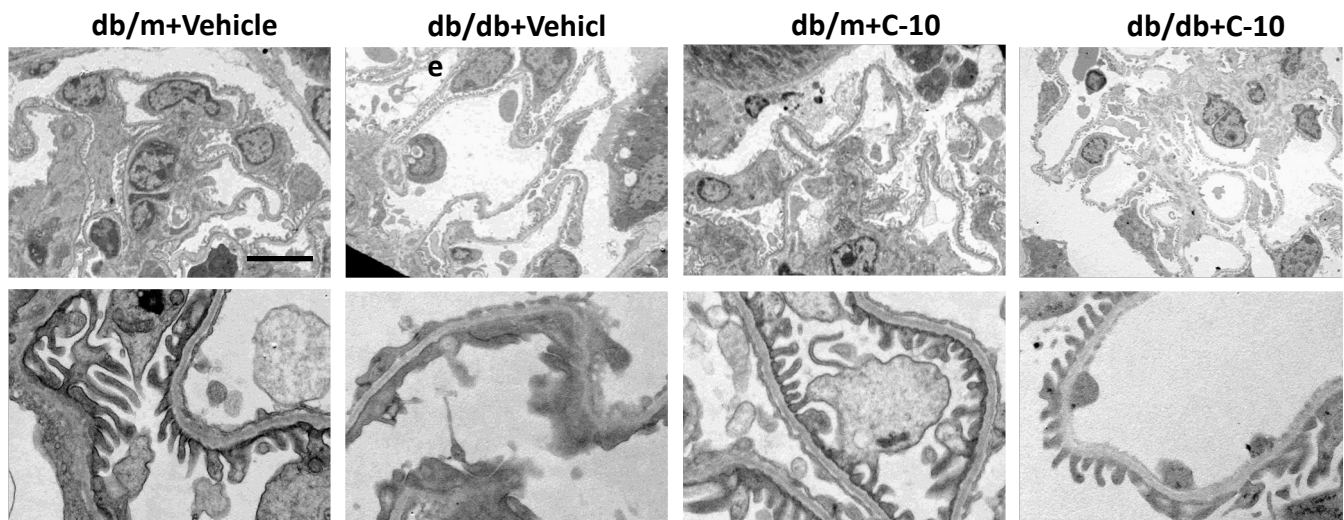

B

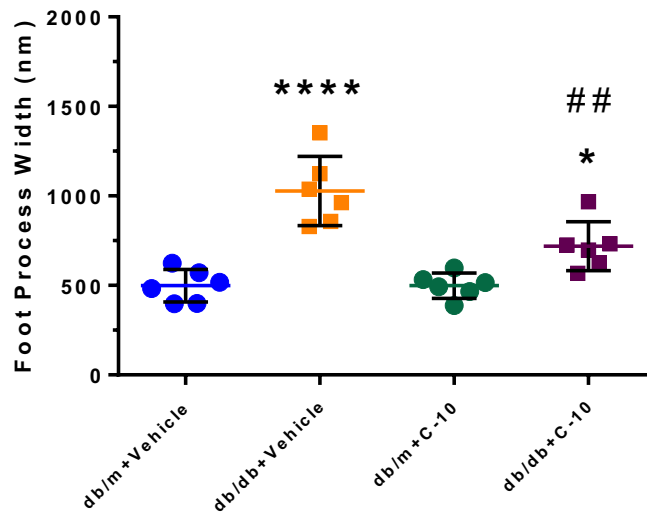

**Figure S7: C-10 ameliorates podocyte foot process effacement in diabetic mice.** (A) Representative transmission electron microscopy images of control and diabetic mice at low (2k, top) and high (10k, bottom) magnifications. Scale bar: 5 μm. (B) Quantification of foot process widths (60 glomeruli per group, n=6 mice per group. \* $P < 0.05$  and \*\*\*\* $P < 0.0001$  when compared with control *db/m* group; ## $P < 0.01$  when compared with *db/db+Vehicle* mice by 1-way ANOVA with Bonferroni correction.

**Figure S8**

**A**

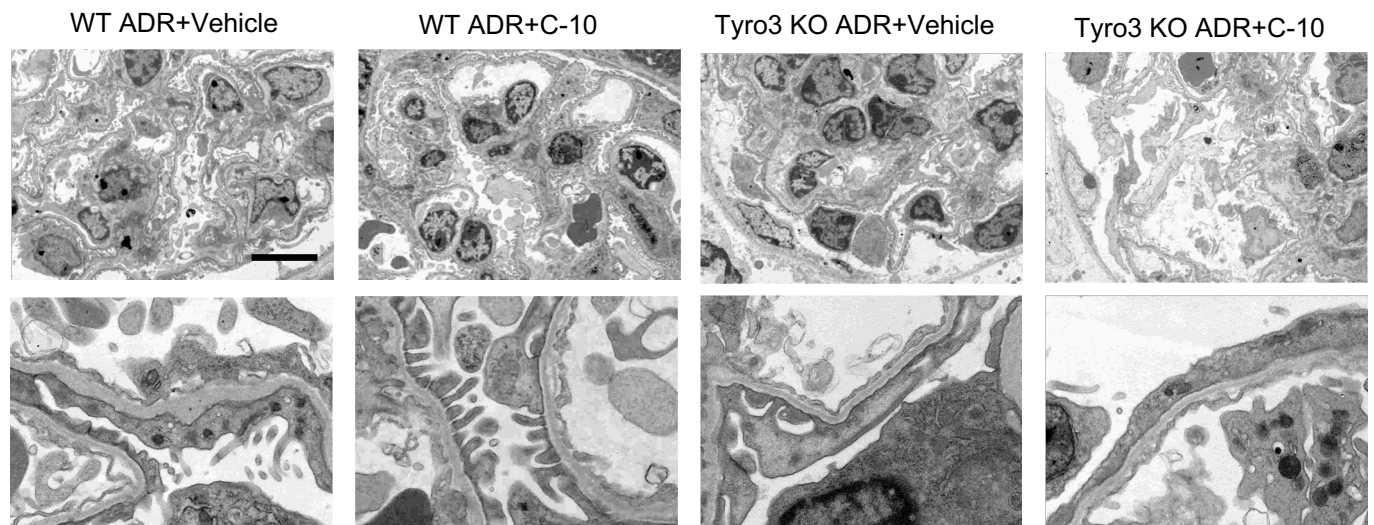

**B**

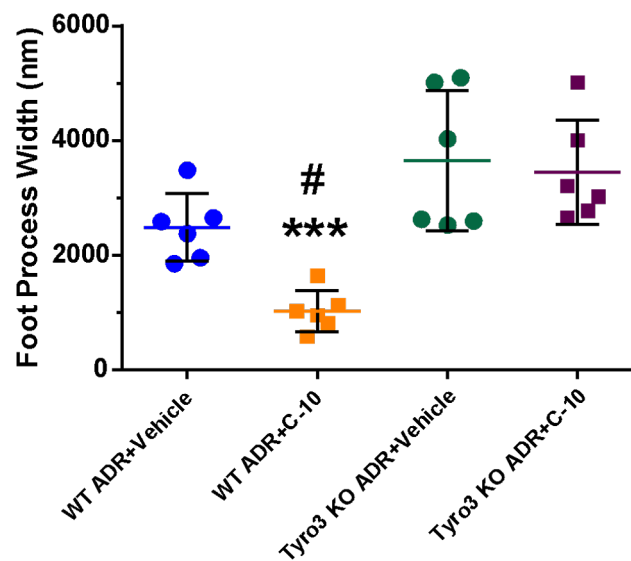

**Figure S8: C-10 fails to protect against podocyte injury in *Tyro3*-knockout ADRN mice.** (A) Representative transmission electron microscopy images of control and ADRN mice at low (2k, top) and high (10k, bottom) magnifications. Scale bar: 5 $\mu$ m. (B) Quantification of foot process widths (60 glomeruli per group, n=6 mice per group. \*\*\* $P$ <0.001 when compared with WT ADR+Vehicle group; # $P$ <0.05 when compared with Tyro3 KO ADR+C-10 mice by 1-way ANOVA with Bonferroni correction.



Uncropped WB images:

Figure 1A

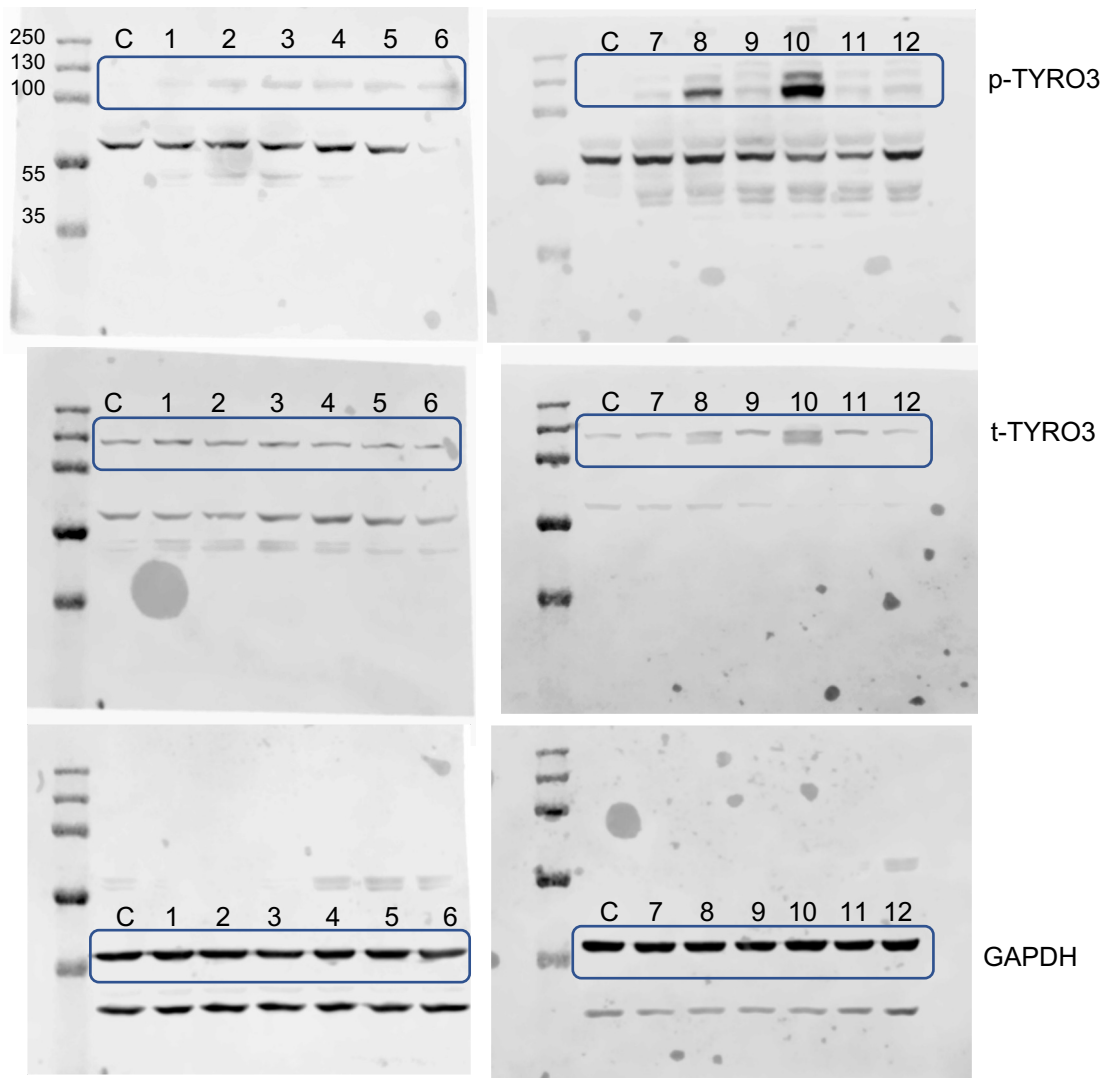

Figure 1B

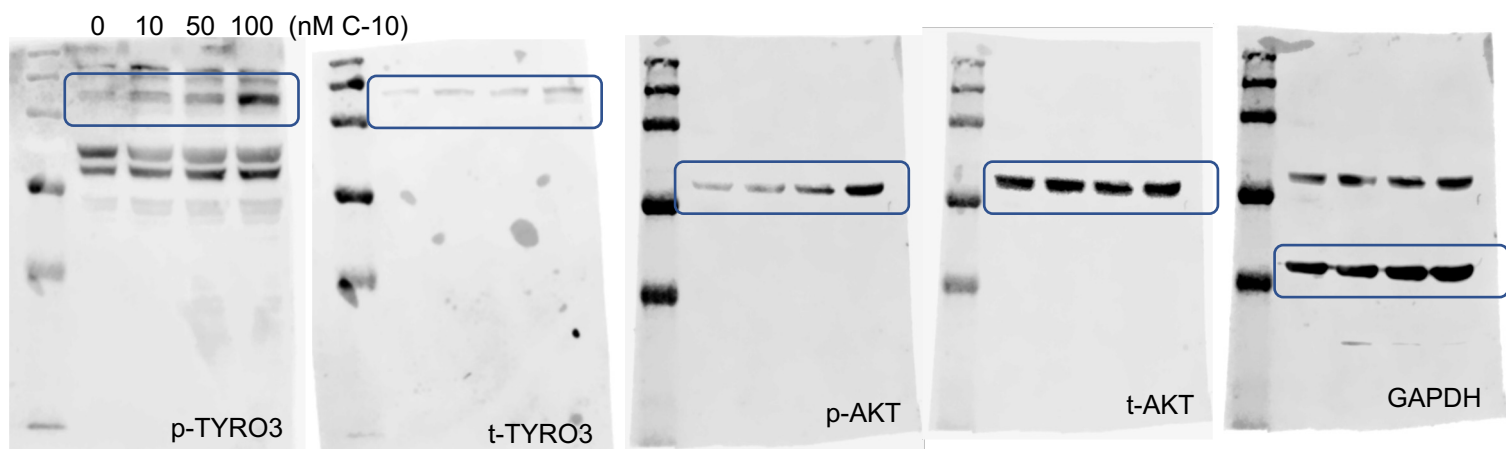

**Figure 2A**

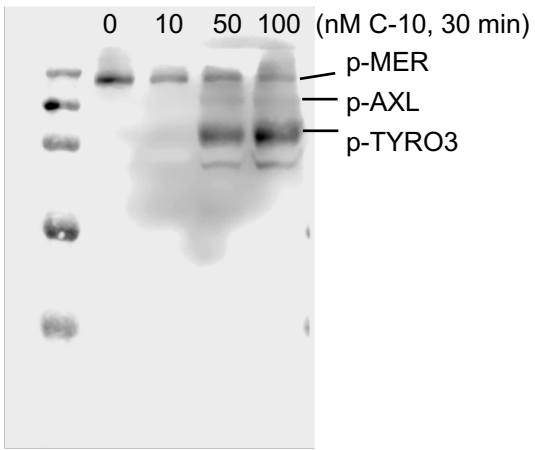

**Figure 2B**

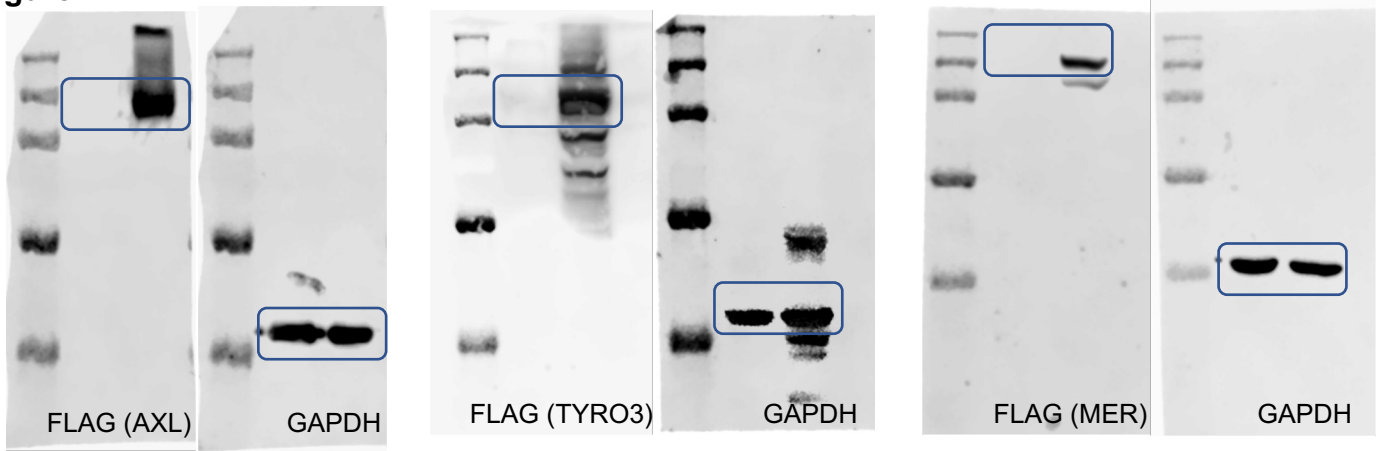

**Figure 2C**

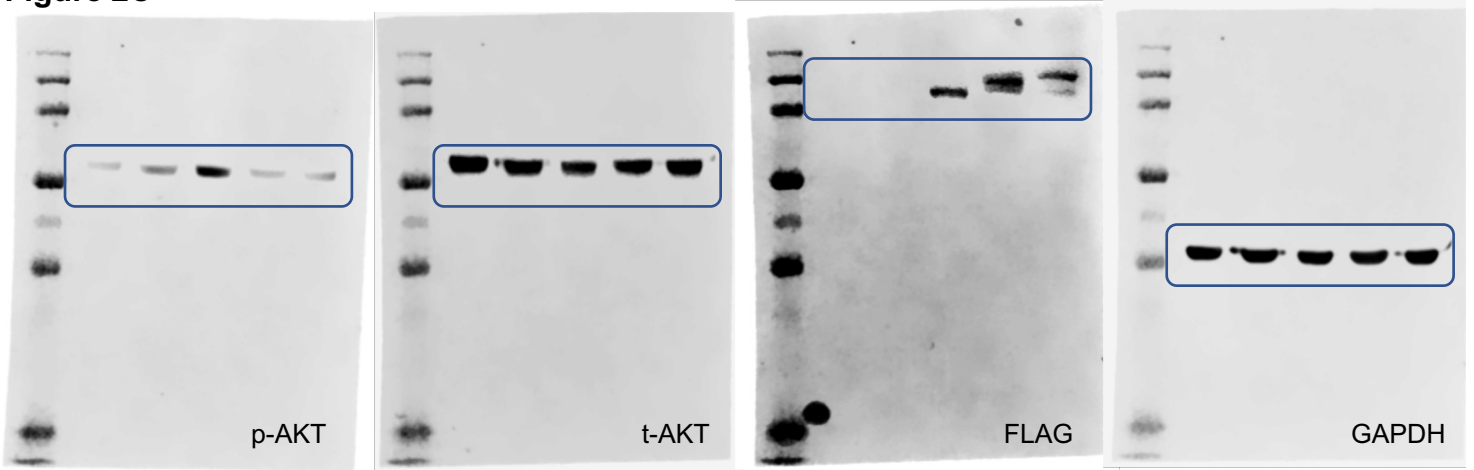

**Figure 2D**

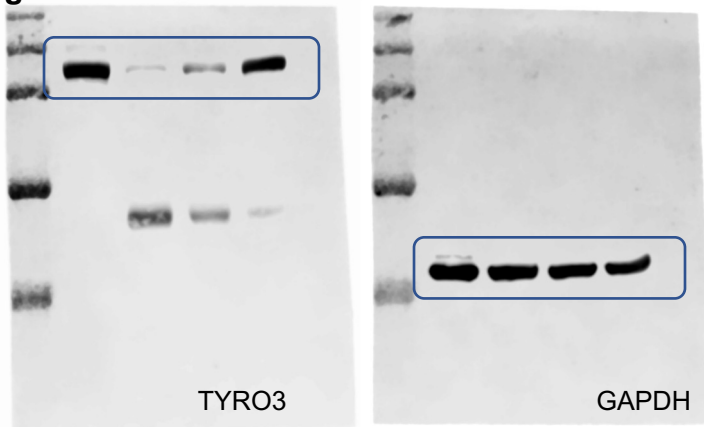

Supplement: jciinsight-8-165207-s094.pdf [file jciinsight-8-165207-s094.pdf]
